# Supplementary material for: Creation of 1D [60]fullerene superstructures and its polymerization by γ-ray irradiation
Source: Royal Society of Chemistry journal article supplement (doi:10.1039/b701583f), 2007-01-01
Supplement: b701583f.pdf [file b701583f.pdf]

## **Supplementary Information**

*for*

Creation of 1-D [60]Fullerene Superstructures and its Polymerization by  $\gamma$ -Ray  
Irradiation

*by*

**Sudip Malik, Norifumi Fujita, Pritam Mukhopadhyay, Yuta Goto,  
Kenji Kaneko, Toshiji Ikeda and Seiji Shinkai\***
